# Supplementary material for: Rutile titanium dioxide prepared by hydrogen reduction of Degussa P25 for highly efficient photocatalytic hydrogen evolution
Source: Royal Society of Chemistry journal article supplement (doi:10.1039/c6cy00296j), 2016-01-01
Supplement: c6cy00296j1.pdf [file c6cy00296j1.pdf]

*Supplementary Information for*

**Rutile Titanium Dioxide Prepared by Hydrogen  
Reduction of Degussa P25 for Highly Efficient  
Photocatalytic Hydrogen Evolution**

*Fumiaki Amano<sup>a\*</sup>, Masashi Nakata<sup>a</sup>, Akira Yamamoto<sup>b,c</sup>, and Tsunehiro Tanaka<sup>b,c</sup>*

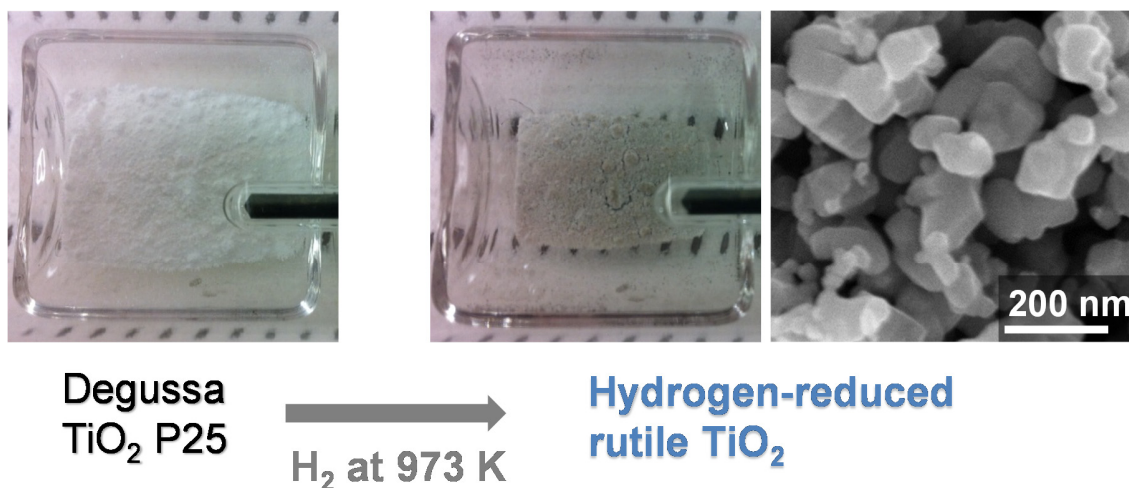

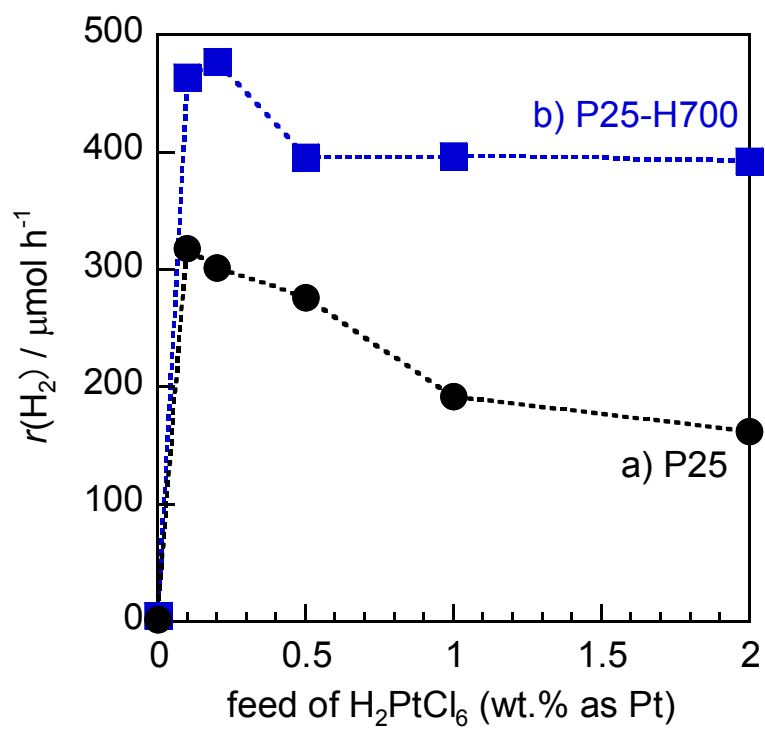

**Figure S1.** Effect of Pt loading (feed of  $\text{H}_2[\text{PtCl}_6]$ ) on the rate of photocatalytic  $\text{H}_2$  evolution from 50 vol.% aqueous ethanol solutions over (a) P25 and (b) P25-H700 with Pt under 380-nm irradiation.

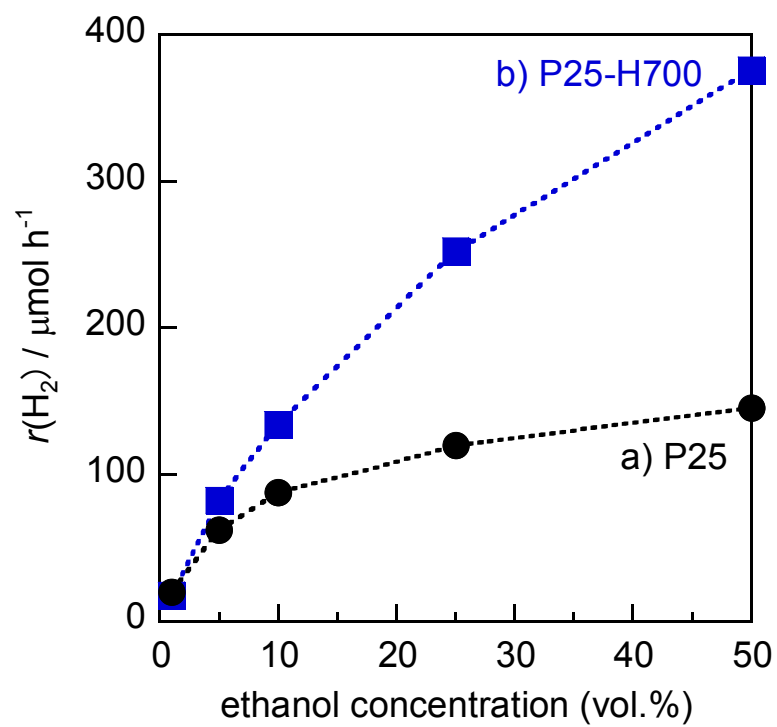

**Figure S2.** Effect of ethanol concentration on the rate of photocatalytic H<sub>2</sub> evolution from aqueous ethanol solutions over (a) P25 and (b) P25-H700 with 2.0 wt.% Pt under 380-nm irradiation.

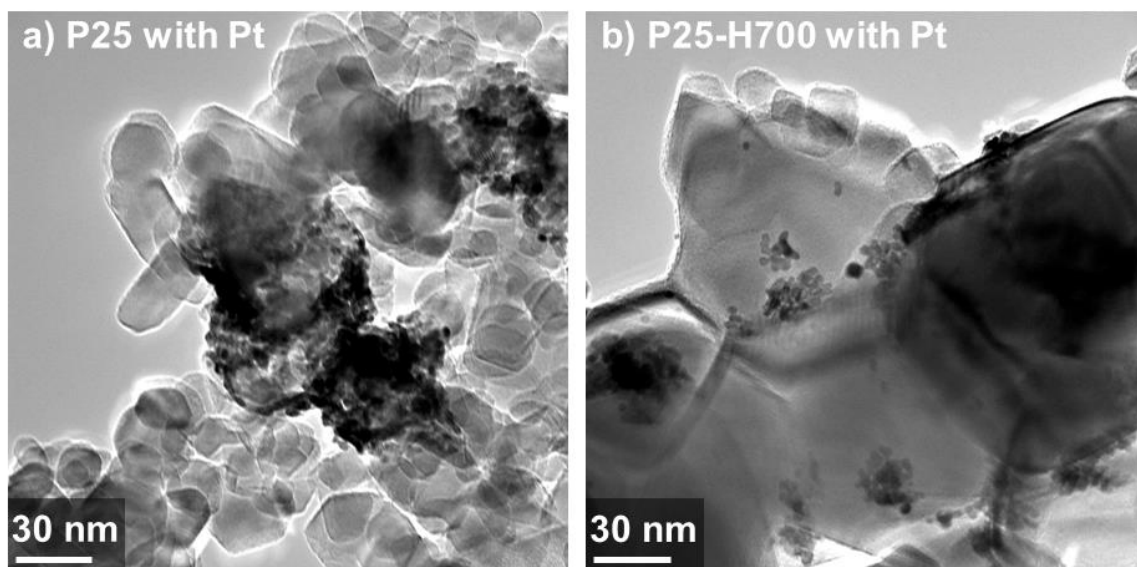

**Figure S3.** TEM images of (a) P25 and (b) P25-H700 with 2.0 wt.% Pt after photocatalytic H<sub>2</sub> evolution from 50 vol.% aqueous ethanol solutions under 380-nm irradiation.

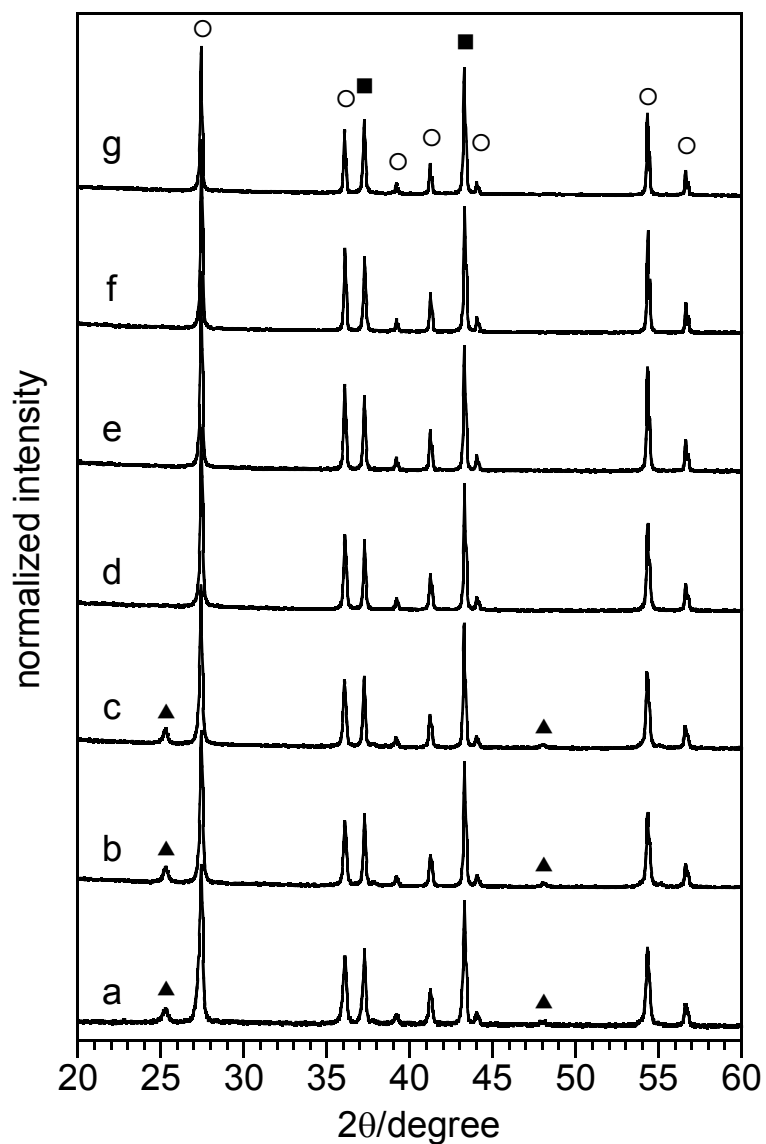

**Figure S4.** XRD patterns of H<sub>2</sub>-reduced TiO<sub>2</sub> after calcination at (a) 300 °C, (b) 500 °C, (c) 700 °C, (d) 800 °C, (e) 900 °C, (f) 1000 °C, and (g) 1100 °C: (▲) anatase TiO<sub>2</sub>, (○) rutile TiO<sub>2</sub>, and (■) internal standard NiO. The TiO<sub>2</sub> was first calcined and then reduced with H<sub>2</sub> at 700 °C.

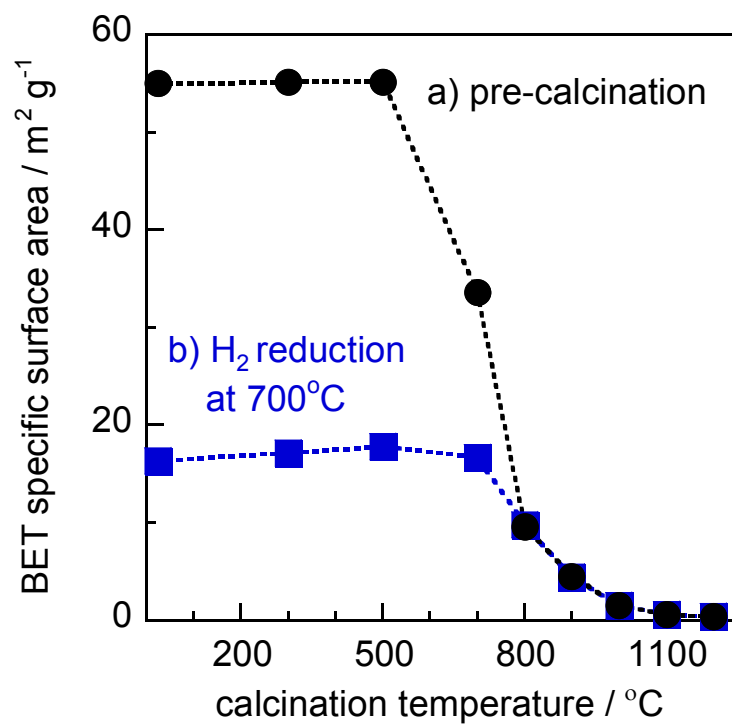

**Figure S5.** BET specific surface area of (a) TiO<sub>2</sub> P25 calcined at different temperatures, and (b) TiO<sub>2</sub> reduced with H<sub>2</sub> at 700°C after calcination.

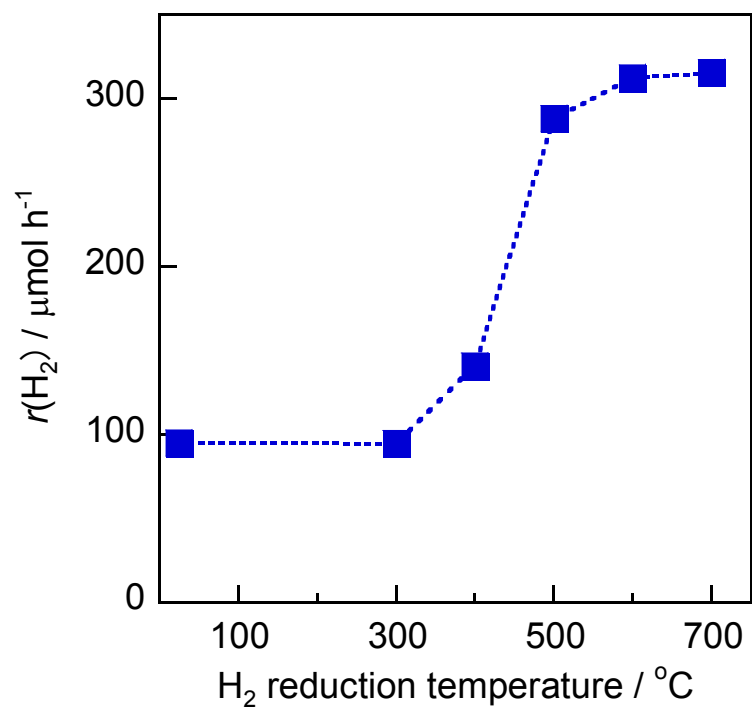

**Figure S6.** Effect of H<sub>2</sub> treatment temperature on the rate of photocatalytic H<sub>2</sub> evolution over phase-pure rutile P900 (Photocatalyst: 50 mg TiO<sub>2</sub>. Solution: 50 vol.% aqueous ethanol solutions containing H<sub>2</sub>PtCl<sub>6</sub> corresponding to 2.0 wt.% Pt, 9.0 mL. Light source: 380-nm LEDs). P900 denotes TiO<sub>2</sub> P25 calcined at 900°C.

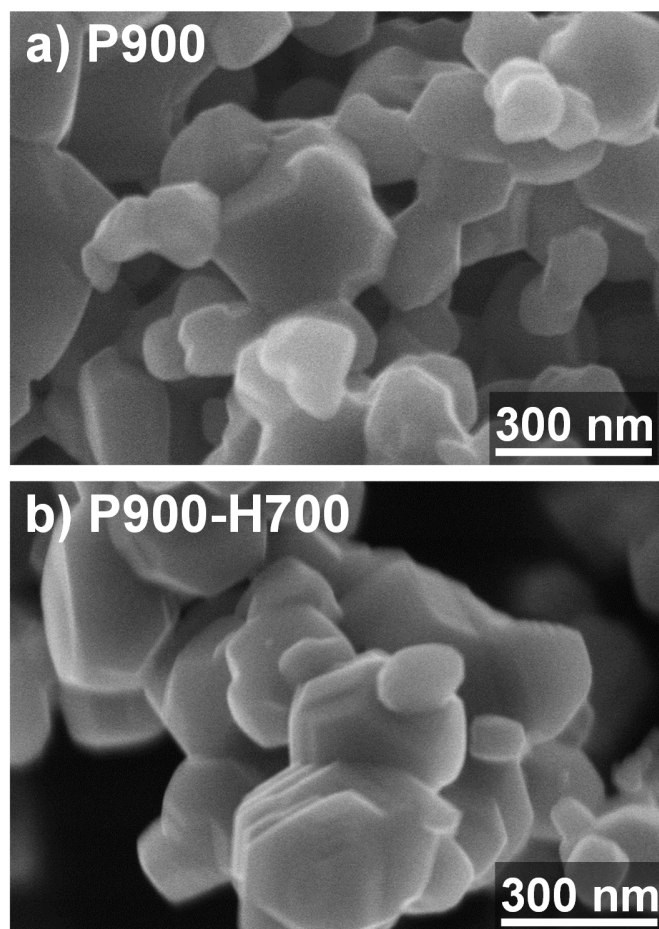

**Figure S7.** SEM images of (a) P900, and (b) P900 reduced with  $\text{H}_2$  at  $700^\circ\text{C}$ , denoted as P900-H700. BET specific surface area was measured to be  $4.5 \text{ m}^2 \text{ g}^{-1}$  for P900 and  $4.4 \text{ m}^2 \text{ g}^{-1}$  for P900-H700. The average particle diameters were estimated to be about 320 nm from their BET specific surface areas using theoretical density of rutile  $\text{TiO}_2$  ( $4.25 \text{ g cm}^{-3}$ ) assuming every particle is a sphere.



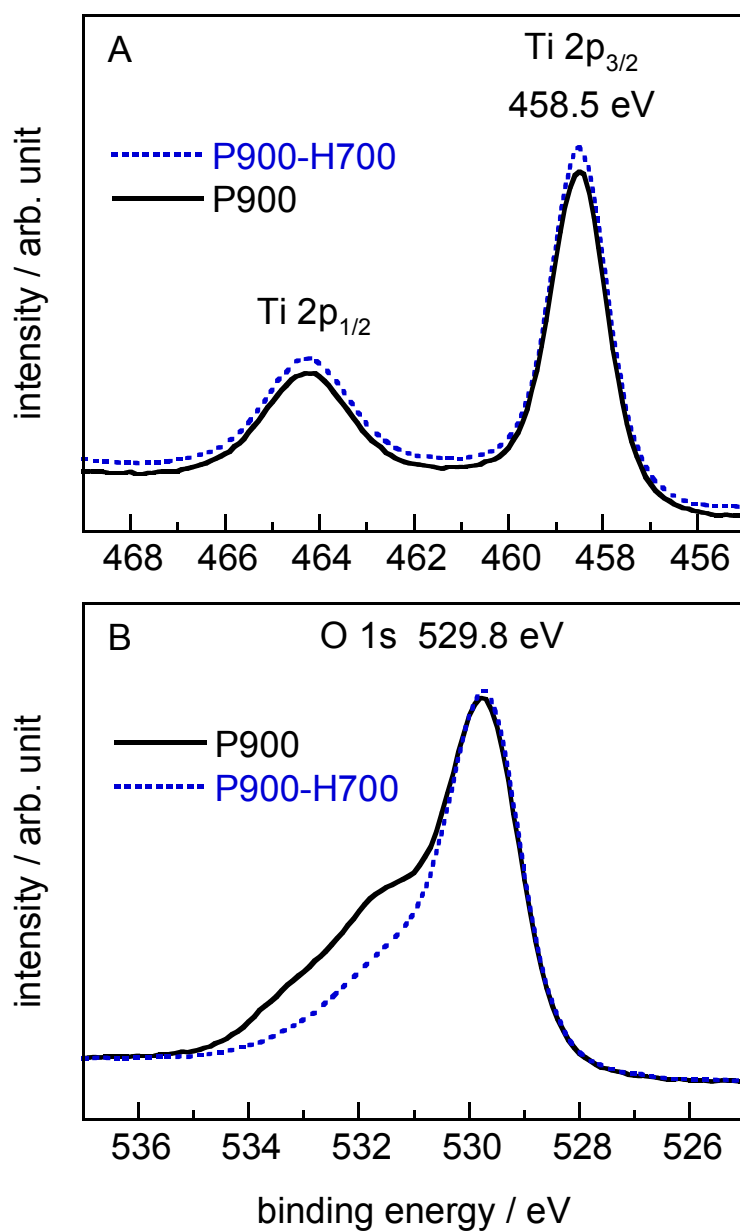

**Figure S8.** (A) Ti 2p X-ray photoelectron spectra (XPS) of P900 and P900-H700. The binding energy of 458.5 eV for Ti 2p<sub>3/2</sub> is similar to the literature value for Ti<sup>4+</sup> in TiO<sub>2</sub>. This indicates that the amount of Ti<sup>3+</sup> ions is small on the surface of H<sub>2</sub>-reduced TiO<sub>2</sub>. (B) O 1s XPS of P900 and P900-H700. The peak at 529.8 eV is assigned to lattice oxygen of TiO<sub>2</sub>.

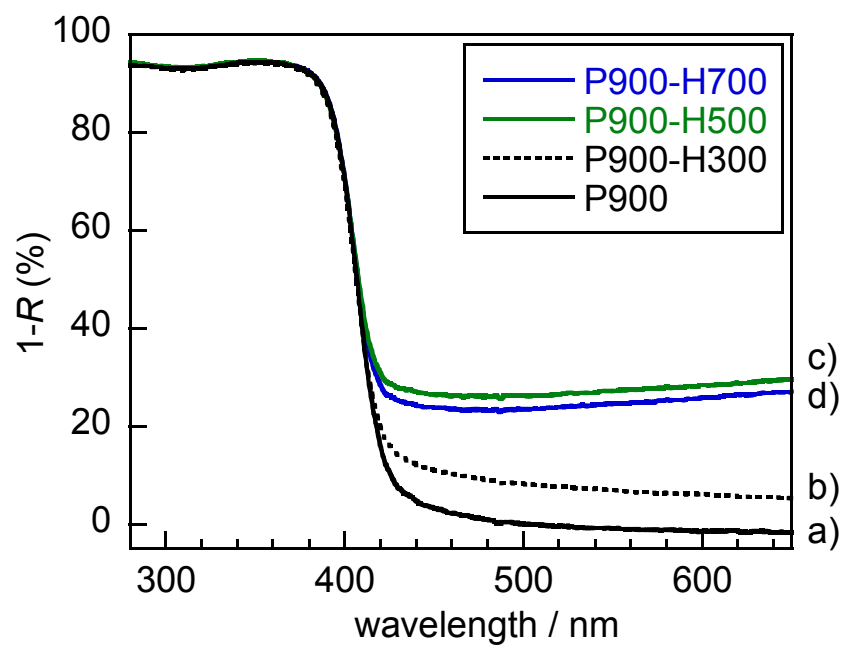

**Figure S9.** Diffuse reflectance UV-visible absorption spectra of (a) P900, (b) P900-H300, (c) P900-H500, and (d) P900-H700.

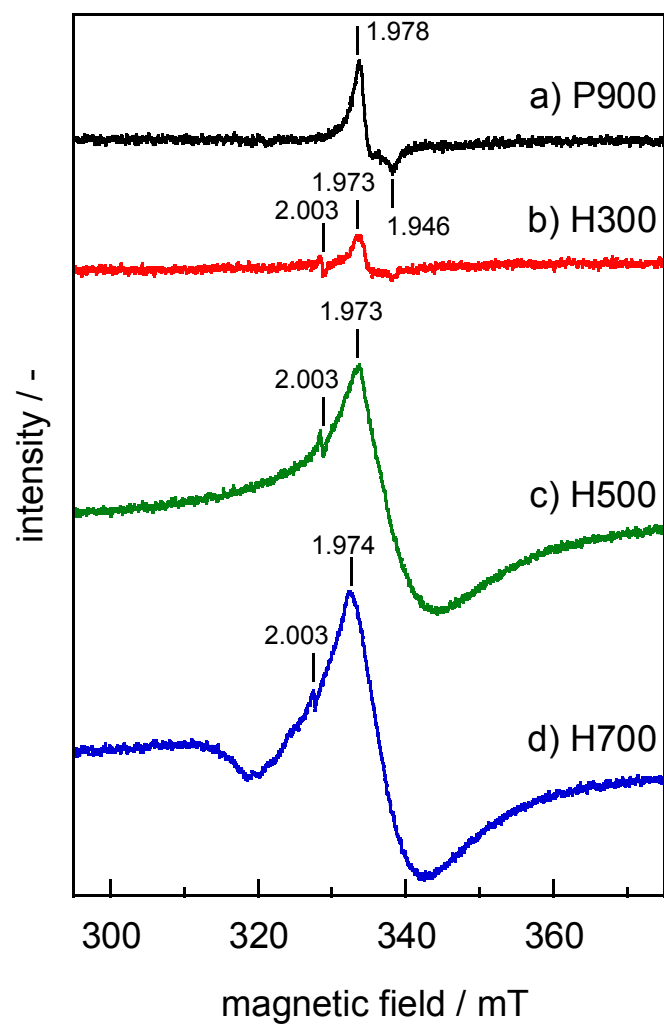

**Figure S10.** ESR spectra of TiO<sub>2</sub> particles monitored at -150 °C in the dark. (a) P900, (b) P900-H300, (c) P900-H500, and (d) P900-H700.
